# Supplementary material
Source: PubMed Central journal article supplement (PMC3568587)
Supplement: AEM.03259-12_zam999104105so1.pdf [file AEM.03259-12_zam999104105so1.pdf]

**Table S1** Validation of transcriptomic results by quantitative PCR

| Oligonucleotides                                       | <i>S. cerevisiae</i><br>gene name | <i>Y. lipolytica</i><br>gene name | Ratio Met   | Ratio Cys   | Ratio Sul    |
|--------------------------------------------------------|-----------------------------------|-----------------------------------|-------------|-------------|--------------|
| CGGAGACATTGACCACTT_F<br>TAGTTCCTTTCGGATAATGGCG_R       | MET3                              | YALI0B08184g                      | 0.04 ± 0.02 | 0.19 ± 0.07 | 0.35 ± 0.09  |
| ACGACAAGTTCATTTCTGACCGTT_F<br>GGTTGGGAAGAGCTCCAGAGAT_R | ARO9                              | YALI0C05258g                      | 0.01 ± 0.01 | 0.01 ± 0.00 | 0.01 ± 0.00  |
| TGTCTGAGCCCATGCAA_F<br>GCAGAGCAGTCACAAAAGC_R           | JLP1                              |                                   | 0.01 ± 0.00 | 0.06 ± 0.04 | 0.06 ± 0.02  |
| ACCGAGCGAGACGAGTA_F<br>GGCCTCATCAATGTACACAGA_R         | SPE3                              | YALI0E33143g                      | 3.49 ± 0.02 | 2.98 ± 0.48 | 2.74 ± 0.19  |
| CTCTCGGCGTCGGAACC_F<br>GTTGGCTCCCAGCTTCTTGT_R          | BAT1                              | YALI0D01265g                      | 3.57 ± 1.27 | 3.37 ± 0.51 | -            |
| ACCATGATTCTTCCCATCG_F<br>TGACAAAACCCAAAGGCG_R          | SSU1                              | YALI0E24167g                      | -           | -           | 29.79 ± 4.29 |
| TCCAGGCCGTCTCTCCC_F<br>GGCCAGCCATATCGAGTCGCA_R         | ACT1                              |                                   | -           | -           | -            |

Ratio Met: high/low methionine; Ratio Cys: high /low cystine; Ratio Sul: high/low sulfate.

Values indicated are means of three experiments, with ecart-type.
