# Supplementary material
Source: PubMed Central journal article supplement (PMC3568587)
Supplement: AEM.03259-12_zam999104105so2.pdf [file AEM.03259-12_zam999104105so2.pdf]

**Table S2** Global results of transcriptomic study**a.**

| <b>Genes differentially expressed</b> | -   | +   |
|---------------------------------------|-----|-----|
| 450 genes in HM/LM                    | 243 | 207 |
| 213 genes in HC/LC                    | 131 | 82  |
| 151 genes in HS/LS                    | 100 | 51  |

H: high; L: low; M: methionine; C: cystine; S: sulfate.

**b.**

| <b>Genes differentially expressed</b> | <b>516</b>   |              |
|---------------------------------------|--------------|--------------|
|                                       | <b>278 -</b> | <b>238 +</b> |
| Unknown / Poorly defined              | 32.6%        | 28.3%        |
| Miscellaneous metabolism              | 19.1%        | 6.3%         |
| <b>Sulfur metabolism</b>              | <b>10.1%</b> | <b>0.8%</b>  |
| Cell organization                     | 8.3%         | 2.5%         |
| Stress                                | 7.2%         | 0.4%         |
| <b>Sulfur related transport</b>       | <b>6.5%</b>  | <b>0.8%</b>  |
| Transport                             | 6.1%         | 0.8%         |
| Protein modification                  | 4.7%         | 5.5%         |
| Maintenance                           | 2.2%         | 5.9%         |
| Protein biosynthesis related          | 1.1%         | 44.1%        |
| Amino acids bioynthesis               | 0.7%         | 2.5%         |
| Catabolism                            | 0.7%         | 0%           |
| Transcription                         | 0.7%         | 2.1%         |

The genes are classified according to gene ontology categories.
