# Supplementary material
Source: PubMed Central journal article supplement (PMC3568587)
Supplement: AEM.03259-12_zam999104105so3.pdf [file AEM.03259-12_zam999104105so3.pdf]

**Table S3** Genes involved in sulfur metabolism not regulated in our experimental conditions

| <i>S. cerevisiae</i><br>gene name | <i>Y. lipolytica</i><br>gene name | Function-description (SGD)                    |
|-----------------------------------|-----------------------------------|-----------------------------------------------|
| MET5                              | YALI0D11176g                      | Sulfite reductase beta subunit                |
| MET 8                             | YALI0E11385g                      | Bifunctional dehydrogenase and ferrochelatase |
| MET22                             | YALI 0F27665g                     | Bisphosphate-3'-nucleotidase                  |
| STR 2                             | YALI 0D17402g                     | Cystathionine gamma-synthase                  |
| STR3                              | YALI 0D00605g                     | Cystathionine beta-lyase                      |
| CYS3                              | YALI 0F05874g                     | Cystathionine gamma-lyase                     |
| CYS4                              | YALI 0E09108g                     | Cystathionine beta-synthase                   |
| GAD1                              | YALI0F08415g<br>YALI0C16753g      | Glutamate decarboxylase                       |
| GSH1                              | YALI 0E30129g                     | Gamma-glutamylcysteine synthetase             |
| ECM38                             | YALI0C11363g                      | Gamma-glutamyltranspeptidase                  |
| MET6                              | YALI 0E12683g                     | Cobalamin-independent methionine synthase     |
| SAH1                              | YALI 0F11759g                     | S-Adenosyl-L-homocysteine hydrolase           |
| SPE2                              | YALI 0E20361g                     | S-Adenosylmethionine decarboxylase            |
| ARO10                             | YALI 0D06930g                     | Phenylpyruvate decarboxylase                  |
| (1)                               | YALI 0C24233g                     | Serine-O-acetyl-transferase                   |
| (2)                               | YALI0F11627g                      | Cysteine dioxygenase                          |

(1) Serine-O-acetyl-transferase. (2) Cysteine dioxygenase. The genes encoding these enzymes are absent in *S. cerevisiae*.
